# Supplementary material for: Metformin Inhibits Migration and Invasion by Suppressing ROS Production and COX2 Expression in MDA-MB-231 Breast Cancer Cells
Source: MDPI journal article supplement (doi:10.3390/ijms19113692), 2018-11-21
Supplement: s1 [file s1]

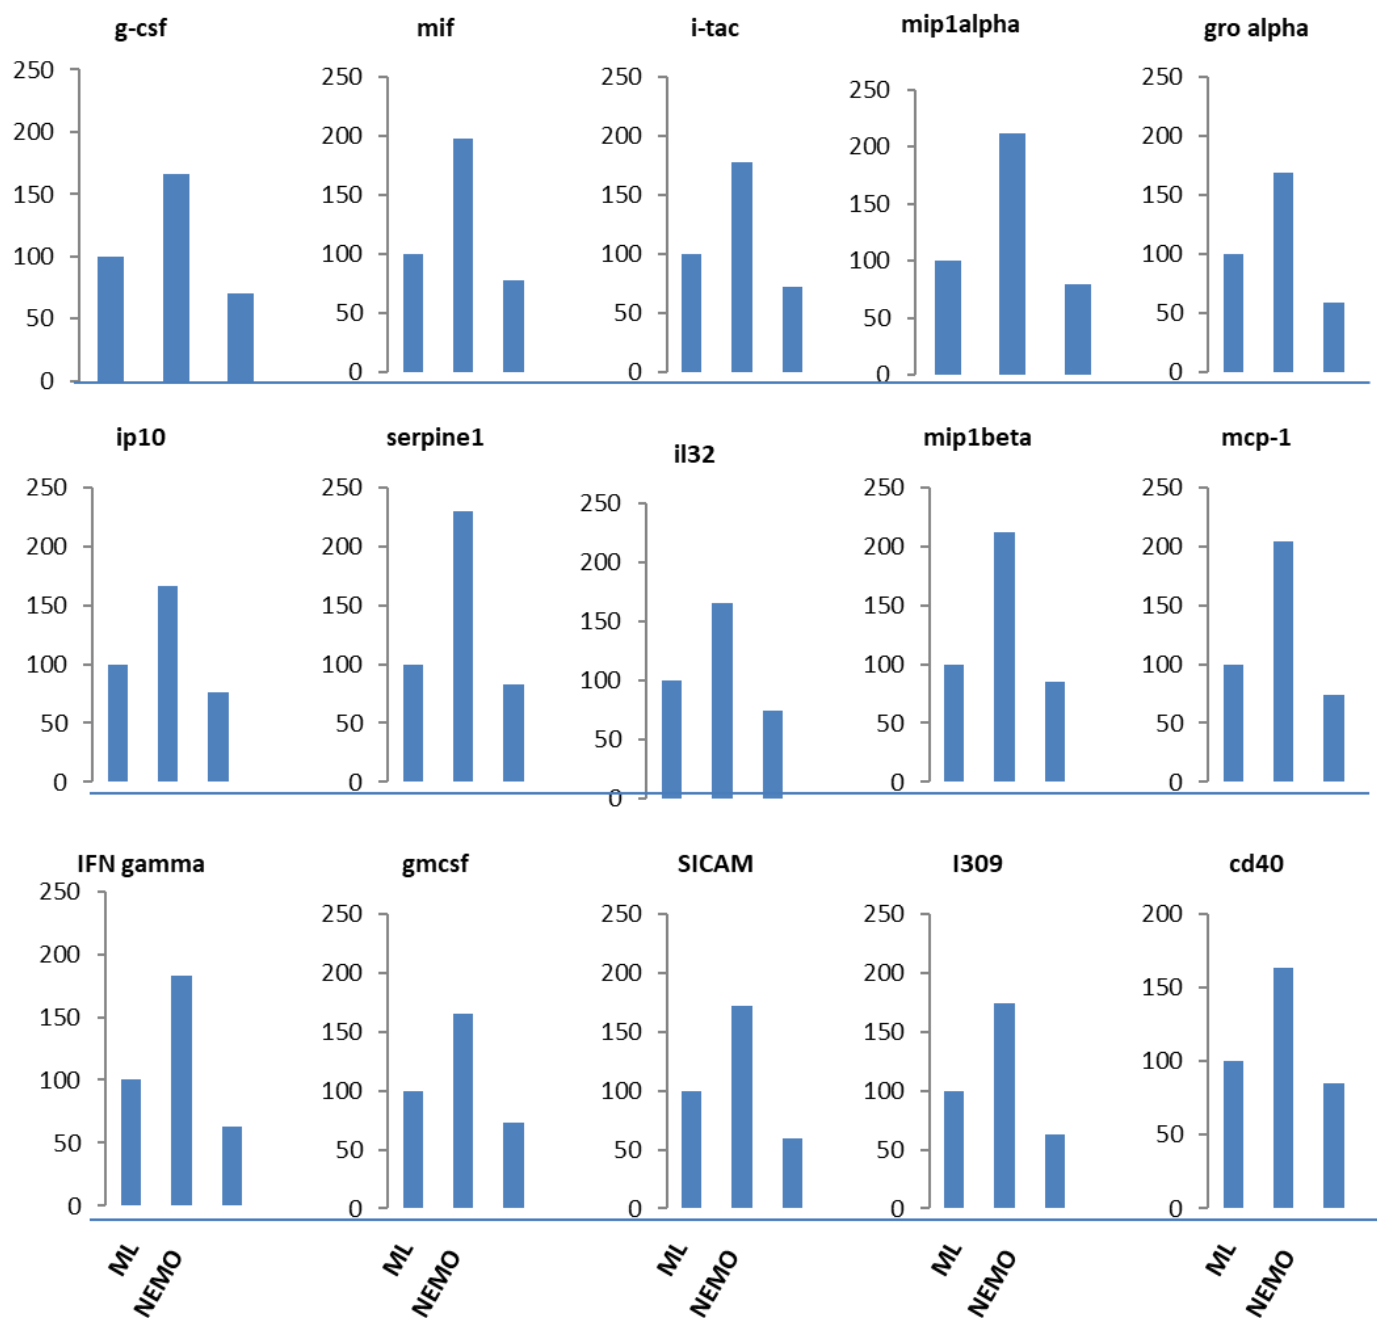

**Supplement 1. Metformin reduces nemesia-induced inflammatory responses in human derma fibroblasts (HDFn).** HDF cells were cultured under monolayer or low attachment conditions in the presence or absence of 100μM metformin. After 24 hours, the supernatants for the cultures were probed using a targeted antibody array (R&D Systems). Metformin attenuated the inflammatory response, as evidenced by blunting the expression of nemesia induced pro-inflammatory cytokines.
